# Supplementary material
Source: publisher site journal article supplement (https://www.dovepress.com/article/553790)
Supplement: Supplementary file 1 [file supplementary%20materials.docx]

**Supporting materials**

**Prognostic impact of metabolic and inflammatory risk for periprocedural MI and long-term events in three-vessel disease patients**

Jingjing Song#,1, Ye Liu#,1, Qing Zhou2,3, Lifeng Liu1, Xiaoyan Yang1, Wenyao Wang*,4

1Heart Center and Beijing Key Laboratory of Hypertension，Beijing Chaoyang Hospital，Capital Medical University, Beijing, China

2Department of Cardiology, State Key Laboratory of Cardiovascular Disease, Fuwai Hospital, National Center for Cardiovascular Diseases, Chinese Academy of Medical Sciences and Peking Union Medical College

3Department of Cardiology, Beijing Hospital, National Center of Gerontology, Institute of Geriatric Medicine, Chinese Academy of Medical Sciences, No. 1, Dahua Road, Dongcheng District, Beijing 100730, China

4Department of Cardiology and Institute of Vascular Medicine, Peking University Third Hospital, Beijing, China; Key Laboratory of Molecular Cardiovascular Science, Ministry of Education, Beijing, China.

# These authors contributed equally to this work

* Corresponding author

**Address correspondence and reprint request to:**

**Wenyao Wang, MD, PhD**

Department of Cardiology and Institute of Vascular Medicine, Peking University Third Hospital; Key Laboratory of Molecular Cardiovascular Science, Ministry of Education, Beijing, China.

Address: No.49 Huayuanbei Road, Beijing, China; 100191

Email: wangwy@bjmu.edu.cn

Tel/Fax: +86-010-88396171

**Table S1. Sensitivity analysis of in-hospital and long-term outcomes of CAD patients stratified according to TYG and hsCRP status.**

|  | TyG<8.5,  hsCRP≤2  (n=627) | | TyG<8.5,  hsCRP>2  (n=340) | TyG≥8.5,  hsCRP≤2  (n=1876) | | TyG≥8.5,  hsCRP>2  (n=1652) | | *p* value | | |
| --- | --- | --- | --- | --- | --- | --- | --- | --- | --- | --- |
| ***In-hospital events*** | |  |  |  |  | |  | | | |
| Perioperative MI SCAI | | 12 (1.9) | 6 (1.8) | 31 (1.7) | | 53 (3.2) | | | 0.015 | |
| Perioperative MI 4th UDMI | | 10 (1.6) | 7 (2.1) | 46 (2.5) | | 63 (3.8) | | | 0.011 | |
| Perioperative MI 3rd UDMI | | 23 (3.7) | 13 (3.8) | 77 (4.1) | | 103 (6.2) | | | 0.008 | |
| ***long-term events*** | |  |  |  | |  | | | |  |
| MACCE | | 39 (6.2) | 37 (10.9) | 155 (8.3) | | 162 (9.8) | | | 0.020 | |
| All-cause death | | 8 (1.3) | 11 (3.2) | 22 (1.2) | | 27 (1.6) | | | 0.035 | |
| TVR | | 28 (4.5) | 27 (7.9) | 120 (6.4) | | 127 (7.7) | | | 0.034 | |
| MI | | 9 (1.4) | 5 (1.5) | 29 (1.5) | | 27 (1.6) | | | 0.986 | |
| Stent Thrombosis | | 7 (1.1) | 4 (1.2) | 25 (1.3) | | 17 (1.0) | | | 0.869 | |

CAD, coronary artery disease; TyG, Triglyceride glucose index; hsCRP, high sensitivity C-reactive protein; SCAI, Society for Cardiovascular Angiography and Interventions; 3rd UDMI, the third universal definition of myocardial infarction criteria; 4th UDMI, the fourth universal definition of myocardial infarction criteria; MI, myocardial infarction; MACCEs, major adverse cardiac and cerebrovascular diseases; TVR, target vessel revascularization.

**Table S2. Sensitivity analysis of in-hospital and long-term outcomes of CAD patients (excluded high-risk individuals who dead within 30 days after discharge) stratified according to TYG and hsCRP status.**

|  | TyG<8.5,  hsCRP≤2  (n=627) | | TyG<8.5,  hsCRP>2  (n=340) | TyG≥8.5,  hsCRP≤2  (n=1876) | | TyG≥8.5,  hsCRP>2  (n=1652) | | *p* value | | |
| --- | --- | --- | --- | --- | --- | --- | --- | --- | --- | --- |
| ***In-hospital events*** | |  |  |  |  | |  | | | |
| Perioperative MI SCAI | | 12 (1.9) | 6 (1.8) | 29 (1.6) | | 53 (3.2) | | | 0.008 | |
| Perioperative MI 4th UDMI | | 10 (1.6) | 7 (2.1) | 42 (2.3) | | 62 (3.8) | | | 0.007 | |
| Perioperative MI 3rd UDMI | | 23 (3.7) | 13 (3.8) | 73 (3.9) | | 102 (6.2) | | | 0.005 | |
| ***long-term events*** | |  |  |  | |  | | | |  |
| MACCE | | 35 (5.6) | 36 (10.6) | 136 (7.3) | | 149 (9.1) | | | 0.008 | |
| All-cause death | | 7 (1.1) | 10 (2.9) | 18 (1.0) | | 23 (1.4) | | | 0.029 | |
| TVR | | 26 (4.2) | 27 (8.0) | 109 (5.9) | | 119 (7.3) | | | 0.023 | |
| MI | | 8 (1.3) | 4 (1.2) | 19 (1.0) | | 21 (1.3) | | | 0.898 | |
| Stent Thrombosis | | 7 (1.1) | 3 (0.9) | 19 (1.0) | | 14 (0.9) | | | 0.927 | |

CAD, coronary artery disease; TyG, Triglyceride glucose index; hsCRP, high sensitivity C-reactive protein; SCAI, Society for Cardiovascular Angiography and Interventions; 3rd UDMI, the third universal definition of myocardial infarction criteria; 4th UDMI, the fourth universal definition of myocardial infarction criteria; MI, myocardial infarction; MACCEs, major adverse cardiac and cerebrovascular diseases; TVR, target vessel revascularization.

**Table S3.** **Sensitivity analysis on the odd ratios between hsCRP and PMI in CAD patients stratified according to TYG and hsCRP status.**

|  | Non-events | Events | OR | | *p* value |
| --- | --- | --- | --- | --- | --- |
| Perioperative MI SCAI | |  | |  |  |
| TyG<8.5, hsCRP≤2 | 615 (14%) | 12 (11.8%) | |  |  |
| TyG<8.5, hsCRP>2 | 334 (7.6%) | 6 (5.9%) | | 0.92 (0.34-2.47) | *p* =0.870 |
| TyG≥8.5, hsCRP≤2 | 1845 (42%) | 31 (30.4%) | | 0.86 (0.44-1.69) | *p* =0.663 |
| TyG≥8.5, hsCRP>2 | 1599 (36.4%) | 53 (52%) | | 1.70 (0.90-3.20) | *p* =0.101 |
| Perioperative MI 4th UDMI | |  | |  |  |
| TyG<8.5, hsCRP≤2 | 617 (14.1%) | 10 (7.9%) | |  |  |
| TyG<8.5, hsCRP>2 | 333 (7.6%) | 7 (5.6%) | | 1.30 (0.49-3.44) | *p* =0.601 |
| TyG≥8.5, hsCRP≤2 | 1830 (41.9%) | 46 (36.5%) | | 1.55 (0.78-3.09) | *p* =0.212 |
| TyG≥8.5, hsCRP>2 | 1589 (36.4%) | 63 (50%) | | 2.45 (1.25-4.80) | *p* =0.009 |
| Perioperative MI 3rd UDMI | |  | |  |  |
| TyG<8.5, hsCRP≤2 | 604 (14.1%) | 23 (10.6%) | |  |  |
| TyG<8.5, hsCRP>2 | 327 (7.6%) | 13 (6%) | | 1.04 (0.52-2.09) | *p* =0.903 |
| TyG≥8.5, hsCRP≤2 | 1799 (42%) | 77 (35.6%) | | 1.12 (0.70-1.81) | *p* =0.629 |
| TyG≥8.5, hsCRP>2 | 1549 (36.2%) | 103 (47.7%) | | 1.75 (1.10-2.77) | *p* =0.018 |

CAD, coronary artery disease; TyG, Triglyceride glucose index; hsCRP, high sensitivity C-reactive protein; SCAI, Society for Cardiovascular Angiography and Interventions; 3rd UDMI, the third universal definition of myocardial infarction criteria; 4th UDMI, the fourth universal definition of myocardial infarction criteria.

|  | Non-events | Events | OR | | *p* value |
| --- | --- | --- | --- | --- | --- |
| Perioperative MI SCAI | |  | |  |  |
| TyG<8.5, hsCRP≤2 | 611 (14%) | 12 (12%) | |  |  |
| TyG<8.5, hsCRP>2 | 333 (7.6%) | 6 (6%) | | 0.92 (0.34-2.47) | *p* =0.864 |
| TyG≥8.5, hsCRP≤2 | 1828 (41.9%) | 29 (29%) | | 0.81 (0.41-1.59) | *p* =0.538 |
| TyG≥8.5, hsCRP>2 | 1586 (36.4%) | 53 (53%) | | 1.70 (0.90-3.21) | *p* =0.100 |
| Perioperative MI 4th UDMI | |  | |  |  |
| TyG<8.5, hsCRP≤2 | 613 (14.1%) | 10 (8.3%) | |  |  |
| TyG<8.5, hsCRP>2 | 332 (7.7%) | 7 (5.8%) | | 1.29 (0.49-3.43) | *p* =0.606 |
| TyG≥8.5, hsCRP≤2 | 1815 (41.8%) | 42 (34.7%) | | 1.42 (0.71-2.84) | *p* =0.325 |
| TyG≥8.5, hsCRP>2 | 1577 (36.4%) | 62 (51.2%) | | 2.41 (1.23-4.73) | *p* =0.011 |
| Perioperative MI 3rd UDMI | |  | |  |  |
| TyG<8.5, hsCRP≤2 | 600 (14.1%) | 23 (10.9%) | |  |  |
| TyG<8.5, hsCRP>2 | 326 (7.7%) | 13 (6.2%) | | 1.04 (0.52-2.08) | *p* =0.911 |
| TyG≥8.5, hsCRP≤2 | 1784 (42%) | 73 (34.6%) | | 1.07 (0.66-1.72) | *p* =0.789 |
| TyG≥8.5, hsCRP>2 | 1527 (36.2%) | 103 (48.3%) | | 1.73 (1.09-2.75) | *p* =0.020 |

**Table S4.** **Sensitivity analysis on the odd ratios between hsCRP and PMI in CAD patients (excluded high-risk individuals who dead within 30 days after discharge) stratified according to TYG and hsCRP status.**

CAD, coronary artery disease; TyG, Triglyceride glucose index; hsCRP, high sensitivity C-reactive protein; SCAI, Society for Cardiovascular Angiography and Interventions; 3rd UDMI, the third universal definition of myocardial infarction criteria; 4th UDMI, the fourth universal definition of myocardial infarction criteria; MI, myocardial infarction.

**Table S5.** **Sensitivity analysis on the association between hsCRP and endpoints in CAD stratified according to TYG and hsCRP status.**

|  | |  | | | **Model 1** | | | |  | | | | | **Model 2** | | | |  | | | **Model 3** | | | | |
| --- | --- | --- | --- | --- | --- | --- | --- | --- | --- | --- | --- | --- | --- | --- | --- | --- | --- | --- | --- | --- | --- | --- | --- | --- | --- |
|  | **Events** | | **HR (95% CI)** | | | | ***p* value** | | |  | | **HR (95% CI)** | | | | ***p* value** | | | |  | | **HR (95% CI)** | | | ***p* value** |
| ***MACCE*** | |  | | | |
| TyG<8.5, hsCRP≤2 | | 39 (6.2) | | | Reference | |  | |  | | | | | Reference | |  | |  | | Reference | | | | |
| TyG<8.5, hsCRP>2 | | 37 (10.9) | | | 1.31 (1.02-1.68) | | 0.034 | | | | |  | | 1.33 (1.04-1.71) | | 0.025 | | |  | | | 1.32 (1.03-1.70) | | 0.030 | | | |
| TyG≥8.5, hsCRP≤2 | | 155 (8.3) | | | 0.82 (0.64-1.05) | | 0.117 | | | | |  | | 0.82 (0.64-1.06) | | 0.125 | | |  | | | 0.83 (0.65-1.07) | | 0.147 | | | |
| TyG≥8.5, hsCRP>2 | | 162 (9.8) | | | 1.31 (1.02-1.69) | | 0.036 | | | | |  | | 1.30 (1.01-1.68) | | 0.040 | | |  | | | 1.30 (1.01-1.68) | | 0.044 | | | |
| ***All-cause death*** | |  | | |
| TyG<8.5, hsCRP≤2 | | 8 (1.3) | | | Reference | |  | | | | |  | | Reference | |  | | |  | | | Reference | |  | | | |
| TyG<8.5, hsCRP>2 | | 22 (1.2) | | | 1.14 (0.65-1.98) | | 0.648 | | | | |  | | 1.21 (0.69-2.12) | | 0.511 | | |  | | | 1.22 (0.69-2.16) | | 0.492 | | | |
| TyG≥8.5, hsCRP≤2 | | 11 (3.2) | | | 0.75 (0.44-1.28) | | 0.286 | | | | |  | | 0.74 (0.43-1.26) | | 0.269 | | |  | | | 0.74 (0.44-1.27) | | 0.281 | | | |
| TyG≥8.5, hsCRP>2 | | 27 (1.6) | | | 1.76 (1.05-2.96) | | 0.032 | | | | |  | | 1.80 (1.07-3.04) | | 0.027 | | |  | | | 1.80 (1.07-3.03) | | 0.028 | | | |
| ***TVR*** | |  | | |
| TyG<8.5, hsCRP≤2 | | 28 (4.5) | | | Reference | |  | | | | |  | | Reference | |  | | |  | | | Reference | |  | | | |
| TyG<8.5, hsCRP>2 | | 120 (6.4) | | | 1.34 (1.00-1.79) | | 0.050 | | | | |  | | 1.36 (1.01-1.82) | | 0.040 | | |  | | | 1.34 (1.00-1.80) | | 0.052 | | | |
| TyG≥8.5, hsCRP≤2 | | 27 (7.9) | | | 0.82 (0.61-1.10) | | 0.182 | | | | |  | | 0.82 (0.61-1.10) | | 0.193 | | |  | | | 0.83 (0.62-1.12) | | 0.225 | | | |
| TyG≥8.5, hsCRP>2 | | 127 (7.7) | | | 1.33 (0.99-1.79) | | 0.056 | | | | |  | | 1.32 (0.98-1.78) | | 0.064 | | |  | | | 1.32 (0.98-1.77) | | 0.069 | | | |
| ***MI*** | |  | | |  | |  | | | | |  | |  | |  | | |  | | |  | |  | | | |
| TyG<8.5, hsCRP≤2 | | 9 (1.4) | | | Reference | |  | | | | |  | | Reference | |  | | |  | | | Reference | |  | | | |
| TyG<8.5, hsCRP>2 | | 5 (1.5) | | | 1.23 (0.71-2.14) | | 0.458 | | | | |  | | 1.20 (0.69-2.09) | | 0.528 | | |  | | | 1.18 (0.67-2.06) | | 0.573 | | | |
| TyG≥8.5, hsCRP≤2 | | 29 (1.5) | | | 1.01 (0.55-1.86) | | 0.964 | | | | |  | | 1.01 (0.55-1.85) | | 0.973 | | |  | | | 1.01 (0.55-1.86) | | 0.970 | | | |
| TyG≥8.5, hsCRP>2 | | 27 (1.6) | | | 0.88 (0.45-1.70) | | 0.701 | | | | |  | | 0.88 (0.45-1.71) | | 0.710 | | |  | | | 0.88 (0.46-1.71) | | 0.714 | | | |
| ***Thrombosis*** | |  | | |  | |  | | | | |  | |  | |  | | |  | | |  | |  | | | |
| TyG<8.5, hsCRP≤2 | | 7 (1.1) | | | Reference | |  | | | | |  | | Reference | |  | | |  | | | Reference | |  | | | |
| TyG<8.5, hsCRP>2 | | 4 (1.2) | | | 1.06 (0.56-2.01) | | 0.852 | | | | |  | | 1.16 (0.61-2.22) | | 0.643 | | |  | | | 1.05 (0.55-2.02) | | 0.876 | | | |
| TyG≥8.5, hsCRP≤2 | | 25 (1.3) | | | 0.85 (0.43-1.70) | | 0.649 | | | | |  | | 0.86 (0.43-1.72) | | 0.678 | | |  | | | 0.86 (0.43-1.71) | | 0.660 | | | |
| TyG≥8.5, hsCRP>2 | | 17 (1.0) | | | 0.81 (0.39-1.70) | | 0.582 | | | | |  | | 0.79 (0.38-1.66) | | 0.537 | | |  | | | 0.80 (0.38-1.68) | | 0.554 | | | |

Model 1: covariates were adjusted for age.

Model 2: covariates were adjusted for age, gender, smoking.

Model 3: covariates were adjusted for age, gender, smoking, BMI ≥25 kg/m², chronic occlusion and hypertension.

TyG, Triglyceride glucose index; hsCRP, high sensitivity C-reactive protein; TVD, three-vessel disease; MI, myocardial infarction; MACCEs, major adverse cardiac and cerebrovascular diseases; TVR, target vessel revascularization.

**Table S6.** **Sensitivity analysis on the association between hsCRP and endpoints in CAD patients (excluded high-risk individuals who dead within 30 days after discharge) stratified according to TYG and hsCRP status.**

|  | |  | | | **Model 1** | | | |  | | | | | **Model 2** | | | |  | | | **Model 3** | | | | |
| --- | --- | --- | --- | --- | --- | --- | --- | --- | --- | --- | --- | --- | --- | --- | --- | --- | --- | --- | --- | --- | --- | --- | --- | --- | --- |
|  | **Events** | | **HR (95% CI)** | | | | ***p* value** | | |  | | **HR (95% CI)** | | | | ***p* value** | | | |  | | **HR (95% CI)** | | | ***p* value** |
| ***MACCE*** | |  | | | |
| TyG<8.5, hsCRP≤2 | | 39 (6.2) | | | Reference | |  | |  | | | | | Reference | |  | |  | | Reference | | | | |
| TyG<8.5, hsCRP>2 | | 37 (10.9) | | | 1.28 (0.99-1.67) | | 0.061 | | | | |  | | 1.32 (1.02-1.72) | | 0.038 | | |  | | | 1.32 (1.01-1.72) | | 0.043 | | | |
| TyG≥8.5, hsCRP≤2 | | 155 (8.3) | | | 0.80 (0.62-1.04) | | 0.101 | | | | |  | | 0.81 (0.62-1.05) | | 0.113 | | |  | | | 0.82 (0.63-1.06) | | 0.130 | | | |
| TyG≥8.5, hsCRP>2 | | 162 (9.8) | | | 1.43 (1.10-1.85) | | 0.007 | | | | |  | | 1.30 (1.09-1.84) | | 0.009 | | |  | | | 1.41 (1.08-1.68) | | 0.010 | | | |
| ***All-cause death*** | |  | | |
| TyG<8.5, hsCRP≤2 | | 8 (1.3) | | | Reference | |  | | | | |  | | Reference | |  | | |  | | | Reference | |  | | | |
| TyG<8.5, hsCRP>2 | | 22 (1.2) | | | 1.09 (0.60-1.97) | | 0.788 | | | | |  | | 1.24 (0.68-2.26) | | 0.492 | | |  | | | 1.25 (0.68-2.31) | | 0.469 | | | |
| TyG≥8.5, hsCRP≤2 | | 11 (3.2) | | | 0.75 (0.42-1.32) | | 0.318 | | | | |  | | 0.74 (0.42-1.31) | | 0.306 | | |  | | | 0.75 (0.42-1.32) | | 0.315 | | | |
| TyG≥8.5, hsCRP>2 | | 27 (1.6) | | | 1.89 (1.08-3.28) | | 0.025 | | | | |  | | 1.91 (1.09-3.33) | | 0.023 | | |  | | | 1.90 (1.09-3.32) | | 0.024 | | | |
| ***TVR*** | |  | | |
| TyG<8.5, hsCRP≤2 | | 28 (4.5) | | | Reference | |  | | | | |  | | Reference | |  | | |  | | | Reference | |  | | | |
| TyG<8.5, hsCRP>2 | | 120 (6.4) | | | 1.31 (0.97-1.77) | | 0.080 | | | | |  | | 1.33 (0.98-1.80) | | 0.066 | | |  | | | 1.31 (0.97-1.78) | | 0.080 | | | |
| TyG≥8.5, hsCRP≤2 | | 27 (7.9) | | | 0.80 (0.59-1.08) | | 0.148 | | | | |  | | 0.81 (0.60-1.09) | | 0.157 | | |  | | | 0.81 (0.60-1.10) | | 0.180 | | | |
| TyG≥8.5, hsCRP>2 | | 127 (7.7) | | | 1.43 (1.06-1.93) | | 0.019 | | | | |  | | 1.42 (1.05-1.91) | | 0.023 | | |  | | | 1.41 (1.04-1.90) | | 0.025 | | | |
| ***MI*** | |  | | |  | |  | | | | |  | |  | |  | | |  | | |  | |  | | | |
| TyG<8.5, hsCRP≤2 | | 9 (1.4) | | | Reference | |  | | | | |  | | Reference | |  | | |  | | | Reference | |  | | | |
| TyG<8.5, hsCRP>2 | | 5 (1.5) | | | 1.06 (0.58-1.92) | | 0.860 | | | | |  | | 1.07 (0.58-1.96) | | 0.823 | | |  | | | 1.06 (0.57-1.96) | | 0.849 | | | |
| TyG≥8.5, hsCRP≤2 | | 29 (1.5) | | | 1.16 (0.59-2.28) | | 0.663 | | | | |  | | 1.17 (0.60-2.30) | | 0.648 | | |  | | | 1.17 (0.59-2.30) | | 0.650 | | | |
| TyG≥8.5, hsCRP>2 | | 27 (1.6) | | | 0.98 (0.46-2.07) | | 0.959 | | | | |  | | 0.96 (0.45-2.03) | | 0.915 | | |  | | | 0.96 (0.45-2.04) | | 0.922 | | | |
| ***Thrombosis*** | |  | | |  | |  | | | | |  | |  | |  | | |  | | |  | |  | | | |
| TyG<8.5, hsCRP≤2 | | 7 (1.1) | | | Reference | |  | | | | |  | | Reference | |  | | |  | | | Reference | |  | | | |
| TyG<8.5, hsCRP>2 | | 4 (1.2) | | | 0.93 (0.48-1.82) | | 0.838 | | | | |  | | 1.04 (0.53-2.05) | | 0.901 | | |  | | | 1.05 (0.55-2.02) | | 0.878 | | | |
| TyG≥8.5, hsCRP≤2 | | 25 (1.3) | | | 1.02 (0.48-2.19) | | 0.952 | | | | |  | | 1.04 (0.49-2.22) | | 0.919 | | |  | | | 0.86 (0.43-1.71) | | 0.962 | | | |
| TyG≥8.5, hsCRP>2 | | 17 (1.0) | | | 0.76 (0.33-1.78) | | 0.533 | | | | |  | | 0.74 (0.32-1.73) | | 0.487 | | |  | | | 0.80 (0.38-1.68) | | 0.508 | | | |

Model 1: covariates were adjusted for age.

Model 2: covariates were adjusted for age, gender, smoking.

Model 3: covariates were adjusted for age, gender, smoking, BMI ≥25 kg/m², chronic occlusion and hypertension.

TyG, Triglyceride glucose index; hsCRP, high sensitivity C-reactive protein; TVD, three-vessel disease; MI, myocardial infarction; MACCEs, major adverse cardiac and cerebrovascular diseases; TVR, target vessel revascularization.
